# Supplementary material for: Synthesis and properties of a new second-order NLO chromophore containing the benzo[b]furan moiety for electro-optical materials
Source: Royal Society of Chemistry journal article supplement (doi:10.1039/c4ra04466e), 2014-01-01

## *Supporting Information*

### Synthesis and properties of a new second-order NLO chromophore containing the benzo[b]furan moiety for electro-optical materials

Maolin Zhang,<sup>ab</sup> Guowei Deng,<sup>ab</sup> Airui Zhang,<sup>ab</sup> Huajun Xu,<sup>ab</sup> Heyan Huang,<sup>ab</sup> Chengcheng Peng,<sup>ab</sup> Shuhui Bo,<sup>a</sup> Xinhou Liu,<sup>a</sup> Zhen Zhen<sup>a</sup> and Ling Qiu\*<sup>a</sup>

<sup>a</sup> Key Laboratory of Photochemical Conversion and Optoelectronic Materials, Technique Institute of Physics and Chemistry, Chinese Academy of Sciences, Beijing, 100049, China. E-mail: [qiuling@mail.ipc.ac.cn](mailto:qiuling@mail.ipc.ac.cn); Fax: +86 10 62554670. Tel: +86 10-8254 3529

<sup>b</sup> Graduated University of Chinese Academy of Sciences, Beijing, 100049, China.

## Contents

1. Figure S1. The frontier HOMO and LUMO orbitals of the chromophores A (left) and B (right) at the B3LYP/6-311G\* level. Table S1. TD-DFT Calculated properties of chromophores A and B.
2. Figure S2. TGA curves of chromophores A and B.
3. Figures S3-S16. NMR spectra of resulted compounds.

1. Figure S1. The frontier HOMO and LUMO orbitals of the A (left) and B (right) at the B3LYP/6-311G\* level.

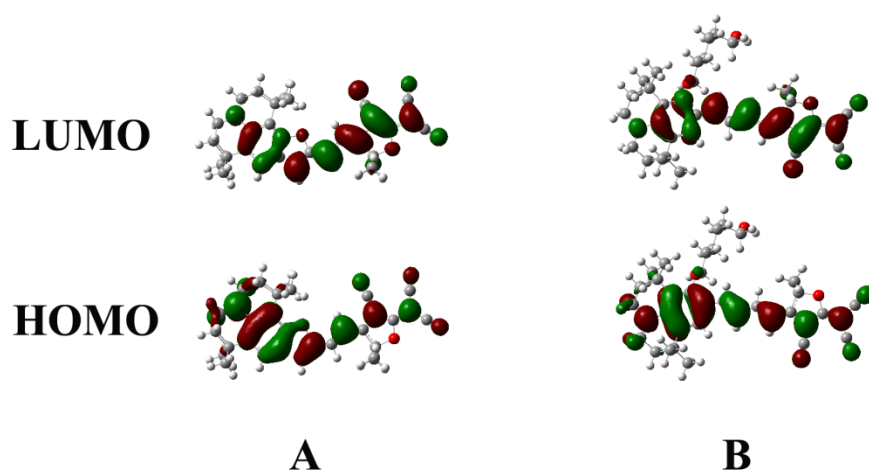

Table S1. TD-DFT Calculated properties of chromophores A and B.

|               | Excited state   | Singlet-A | Excitation energies/eV | Maximum absorption/nm | Oscillator strengths |
|---------------|-----------------|-----------|------------------------|-----------------------|----------------------|
| Chromophore A | Excited state 1 |           | 1.7959                 | 690.39                | 0.3113               |
|               | 127-128         | 0.66784   |                        |                       |                      |
|               | Excited state 2 |           | 2.7624                 | 448.83                | 0.1513               |
|               | 125-128         | 0.19078   |                        |                       |                      |
|               | 126-128         | 0.65087   |                        |                       |                      |
|               | Excited state 3 |           | 3.2732                 | 378.79                | 0.5964               |
|               | 125-128         | 0.61038   |                        |                       |                      |
|               | 126-128         | -0.13912  |                        |                       |                      |
|               | 127-129         | 0.13366   |                        |                       |                      |
| Chromophore B | Excited state 1 |           | 2.3264                 | 532.94                | 1.7208               |
|               | 156-157         | 0.60283   |                        |                       |                      |
|               | Excited state 2 |           | 2.9845                 | 415.43                | 0.1092               |
|               | 153-157         | -0.10531  |                        |                       |                      |
|               | 155-157         | 0.63220   |                        |                       |                      |
|               | 156-158         | -0.19457  |                        |                       |                      |
|               | Excited state 3 |           | 3.3425                 | 370.93                | 0.0056               |
|               | 153-157         | -0.14157  |                        |                       |                      |
|               | 154-157         | 0.67331   |                        |                       |                      |

2. Figure S2. TGA curves of chromophores A and B.

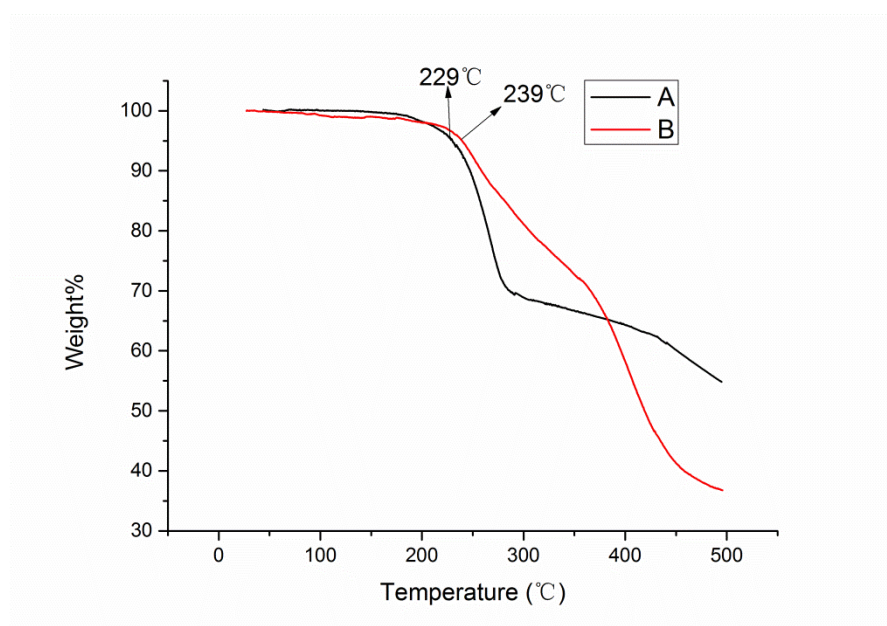

### 3. Figures S3-S16. NMR spectra of resulted compounds.

Figure S3. <sup>1</sup>H NMR spectrum of compound 2

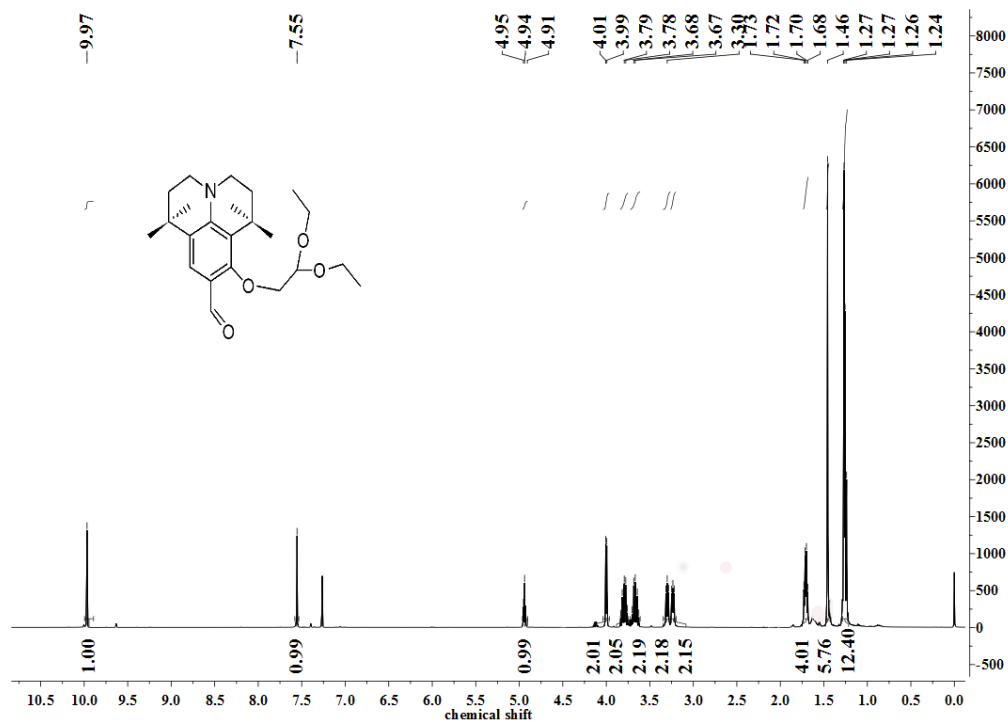

Figure S4. <sup>13</sup>C NMR spectrum of compound 2

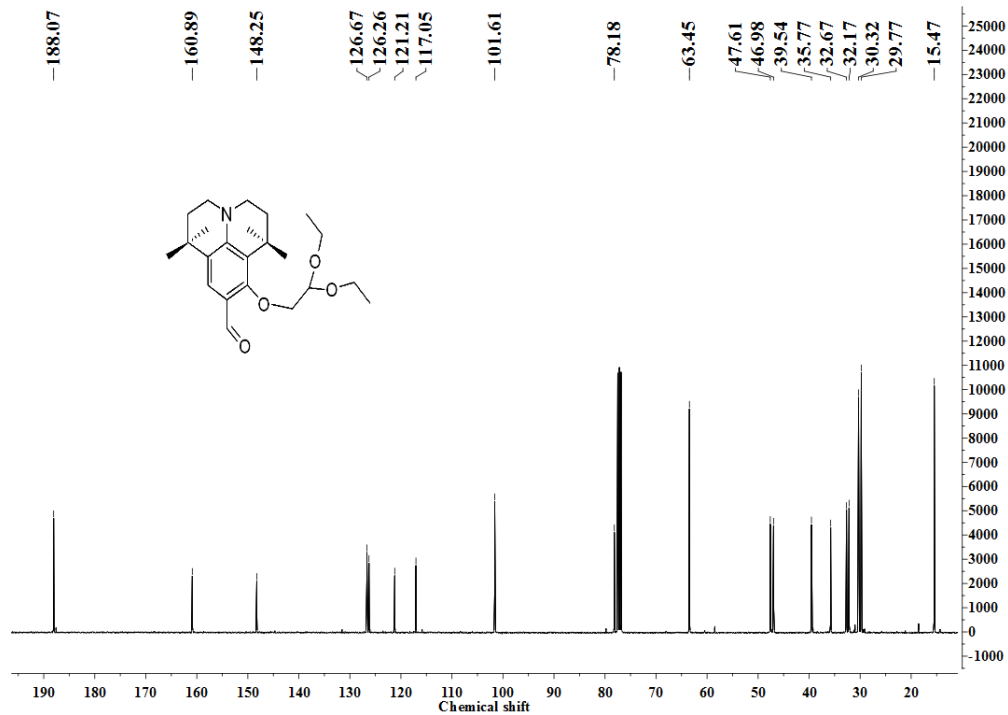

Figure S5. <sup>1</sup>H NMR spectrum of compound 3

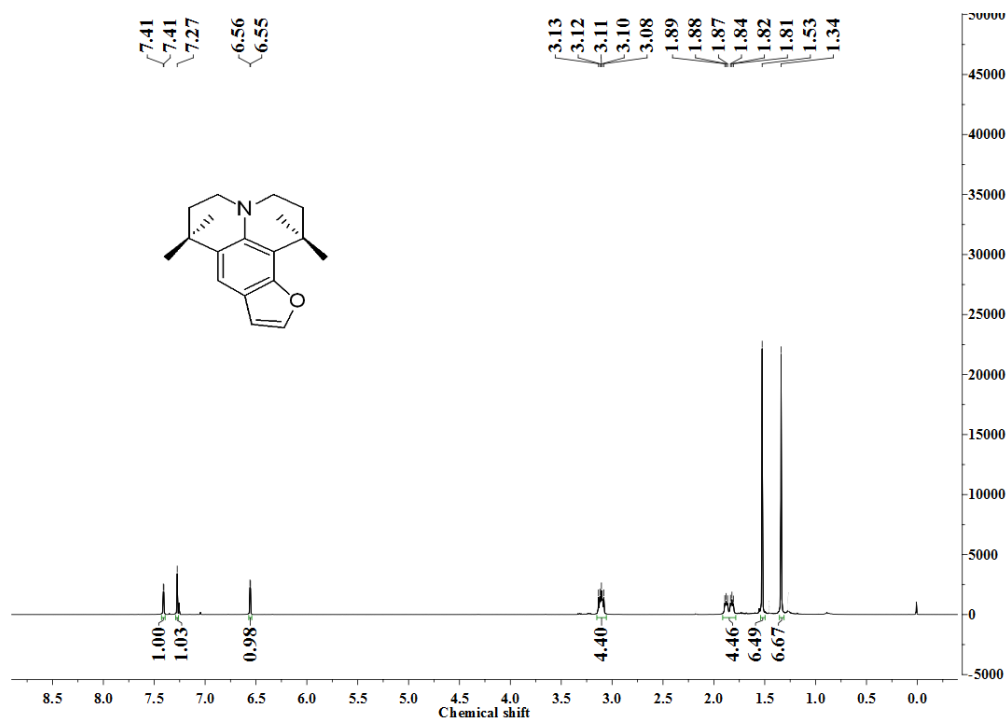

Figure S6. <sup>13</sup>C NMR spectrum of compound 3

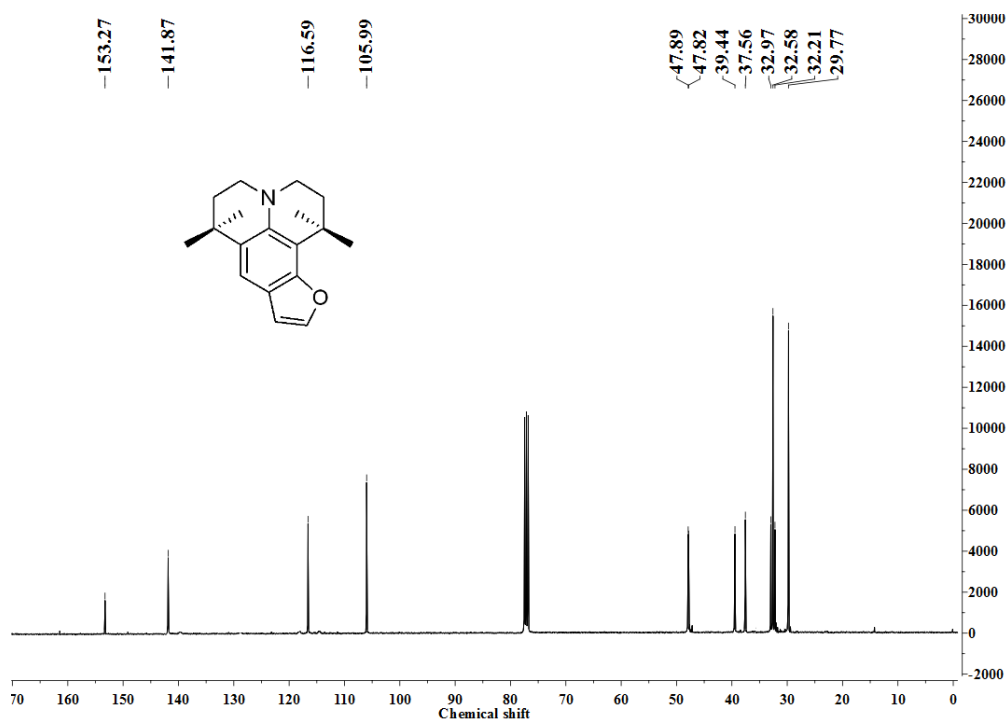

Figure S7. <sup>1</sup>H NMR spectrum of compound 4

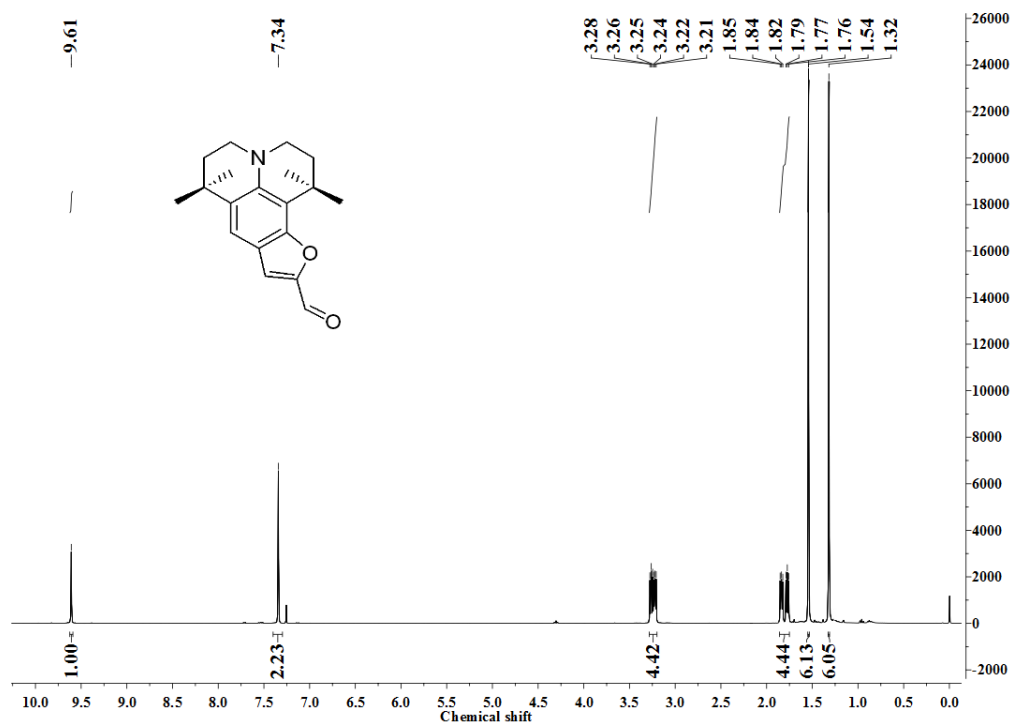

Figure S8. <sup>13</sup>C NMR spectrum of compound 4

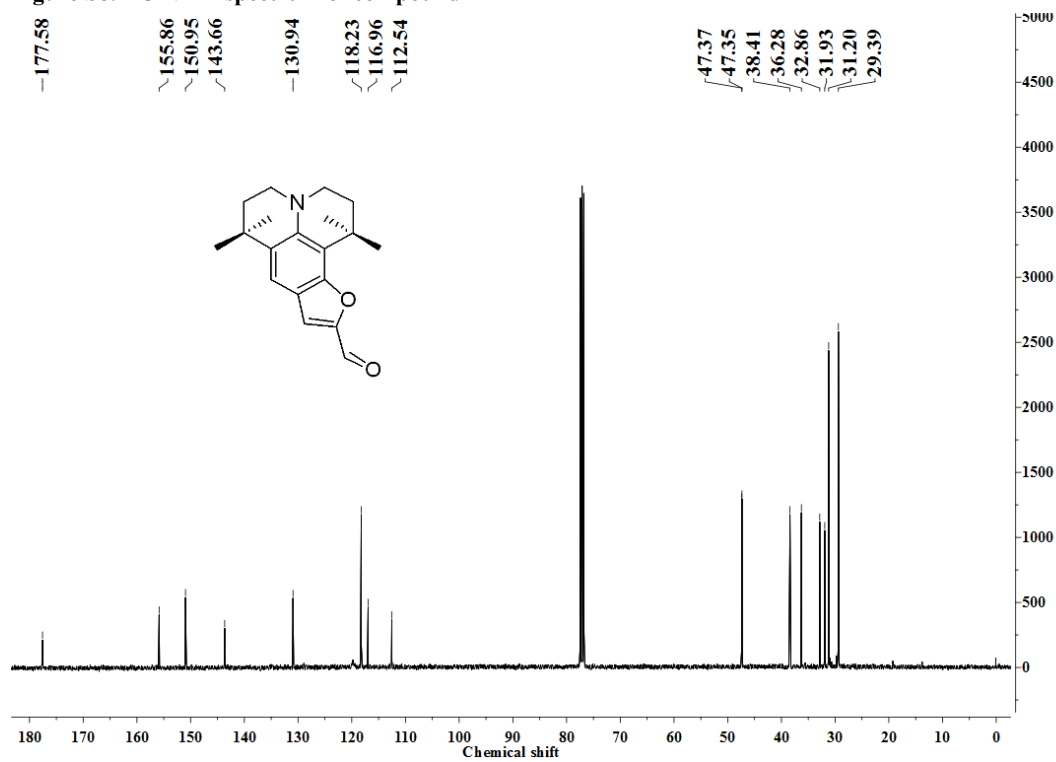

Figure S9. <sup>1</sup>H NMR spectrum of compound A

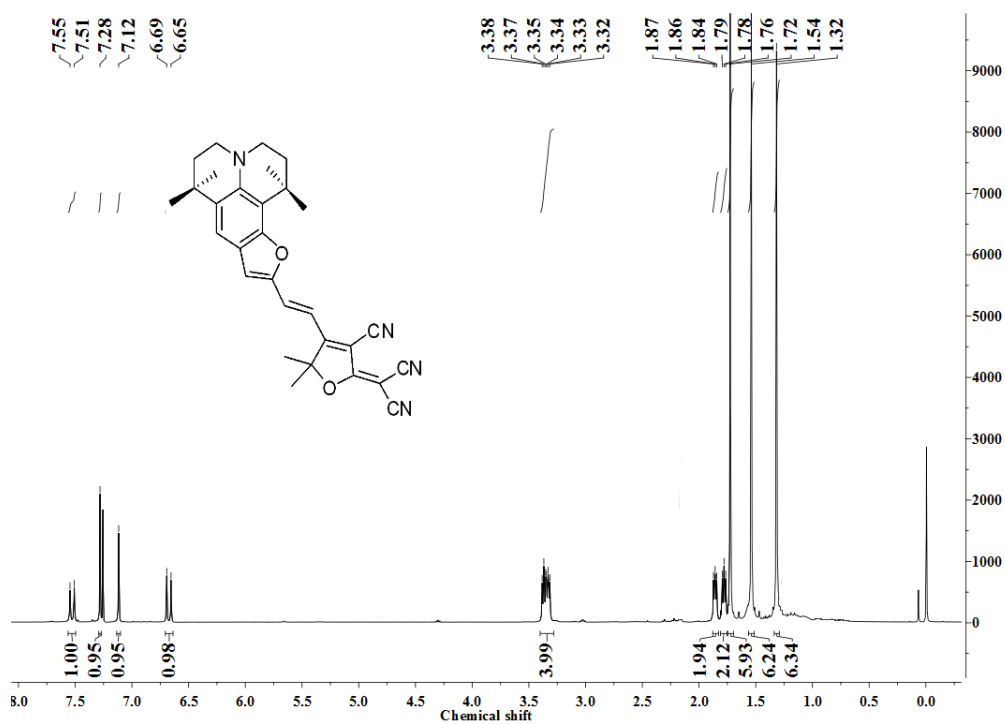

Figure S10. <sup>13</sup>C NMR spectrum of compound A

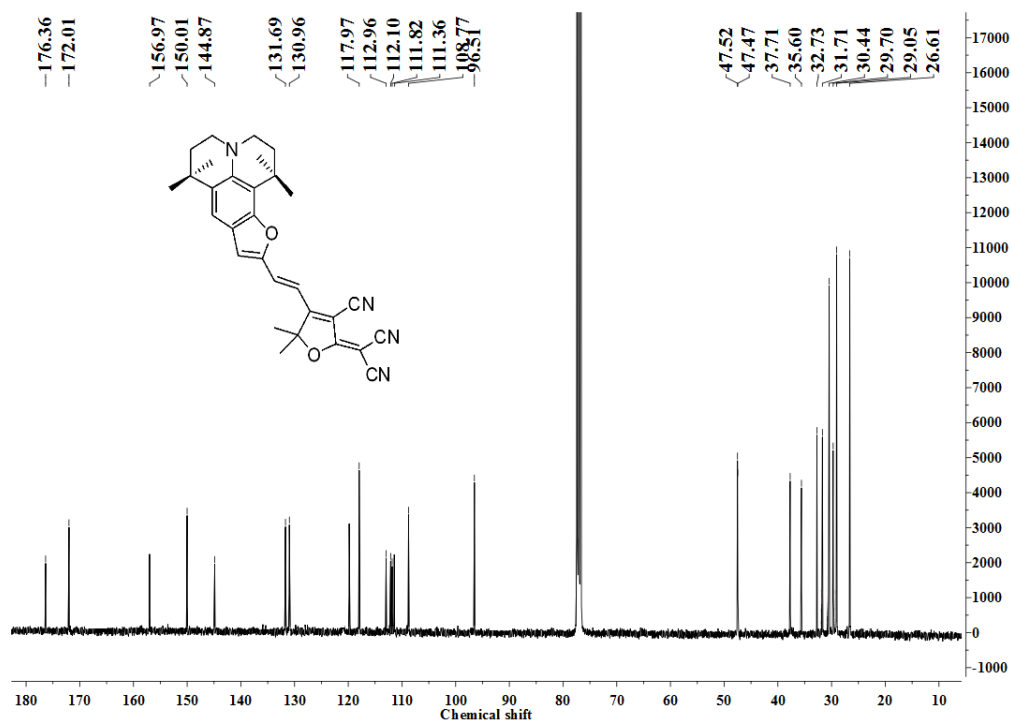

Figure S11. <sup>1</sup>H NMR spectrum of compound 5

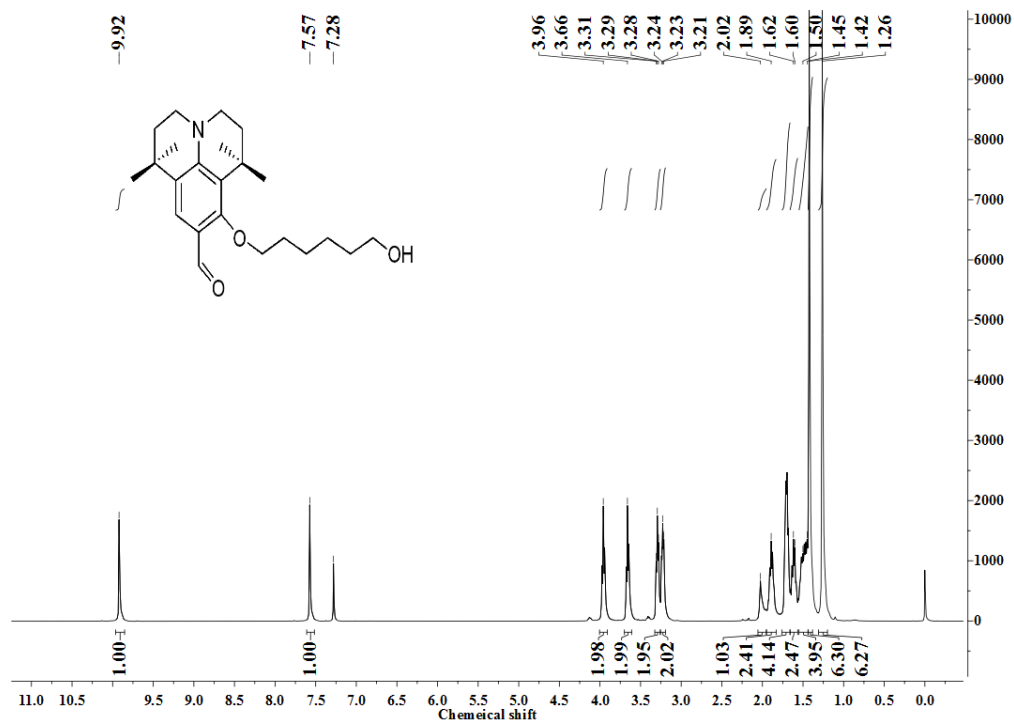

Figure S12. <sup>13</sup>C NMR spectrum of compound 5

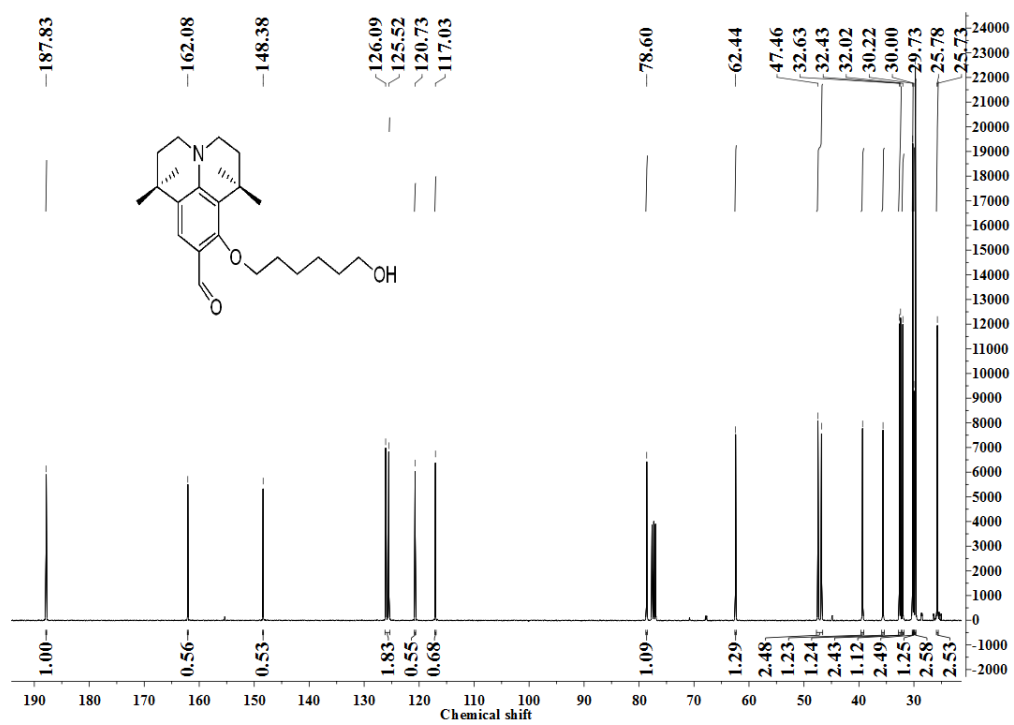



Figure S13. <sup>1</sup>H NMR spectrum of compound 6

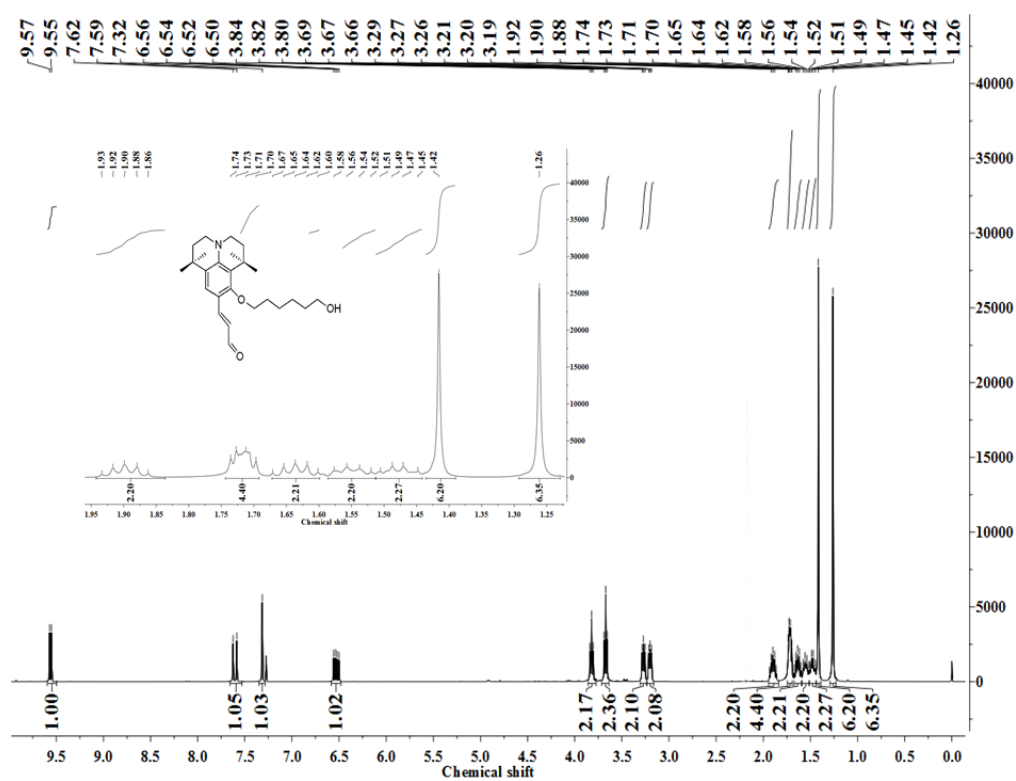

Figure S14. <sup>13</sup>C NMR spectrum of compound 6

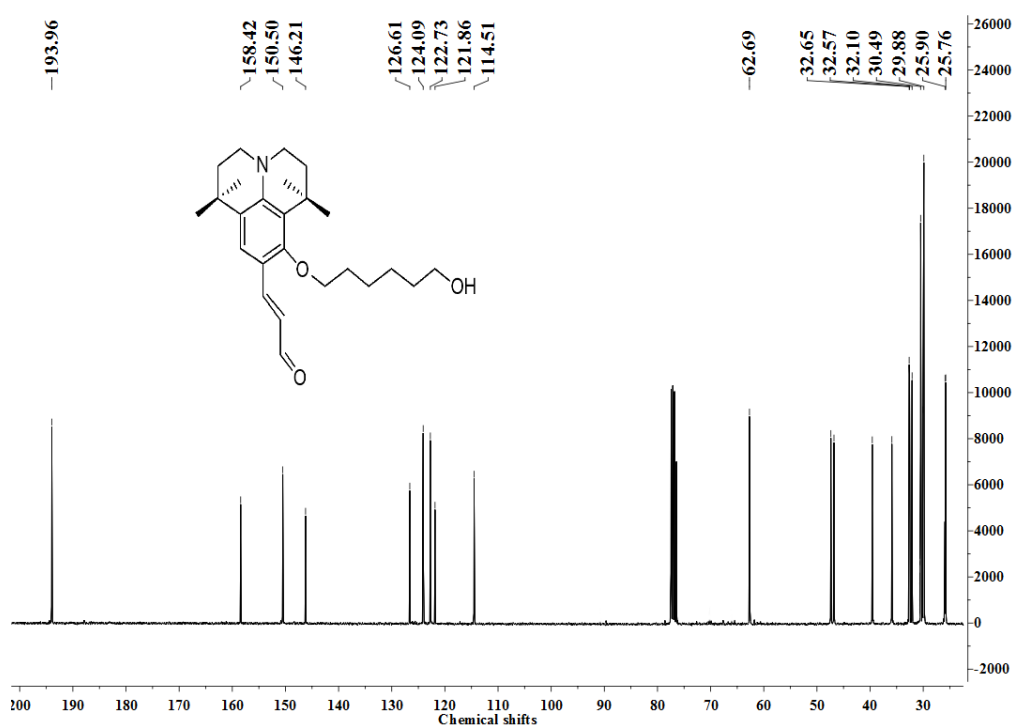

Figure S15. <sup>1</sup>H NMR spectrum of compound B

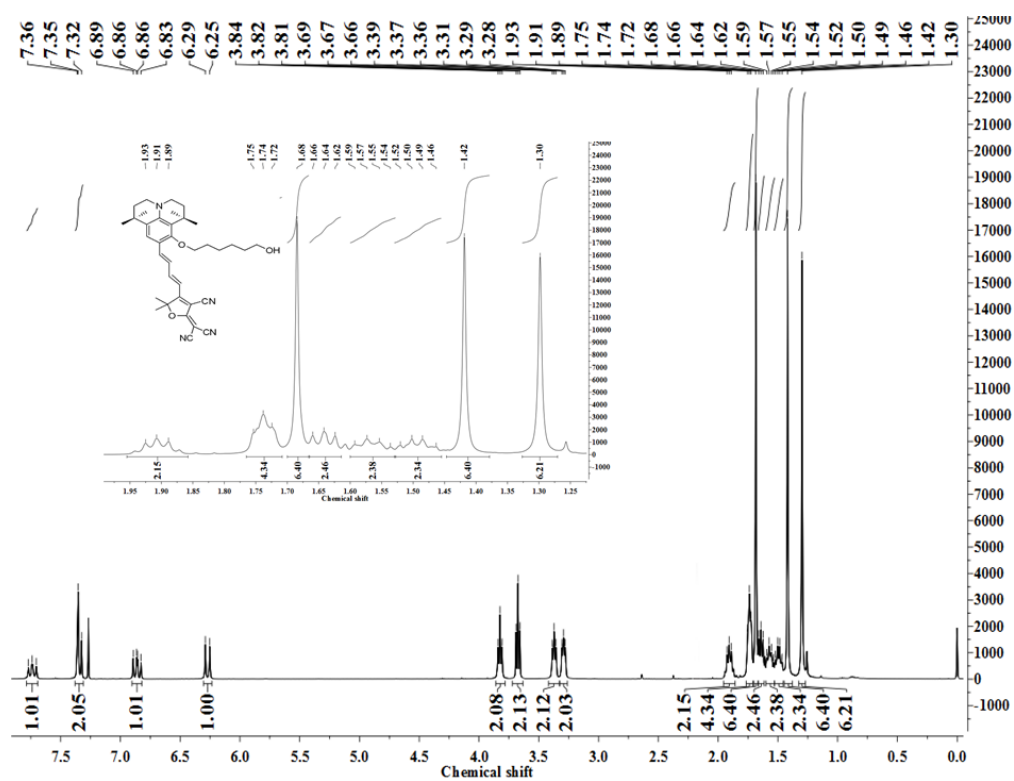

Figure S16. <sup>13</sup>C NMR spectrum of compound B

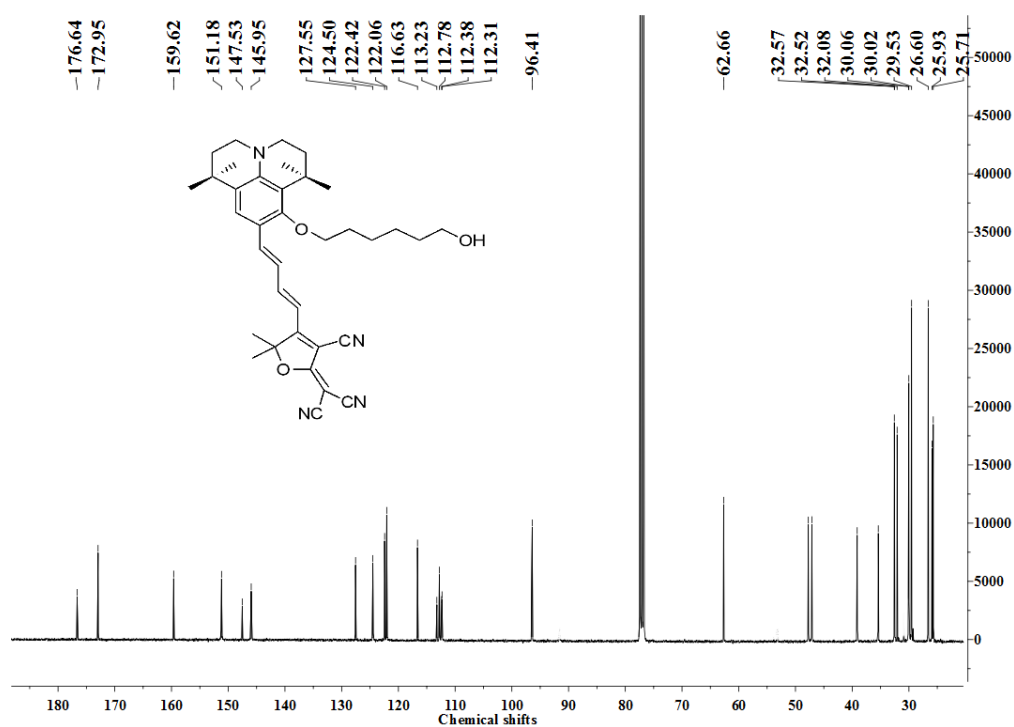

Supplement: c4ra04466e1.pdf [file c4ra04466e1.pdf]
